# Supplementary material
Source: PubMed Central journal article supplement (PMC9662877)
Supplement: can-20-3929_figure_sf2_suppsf2.pdf [file can-20-3929_figure_sf2_suppsf2.pdf]

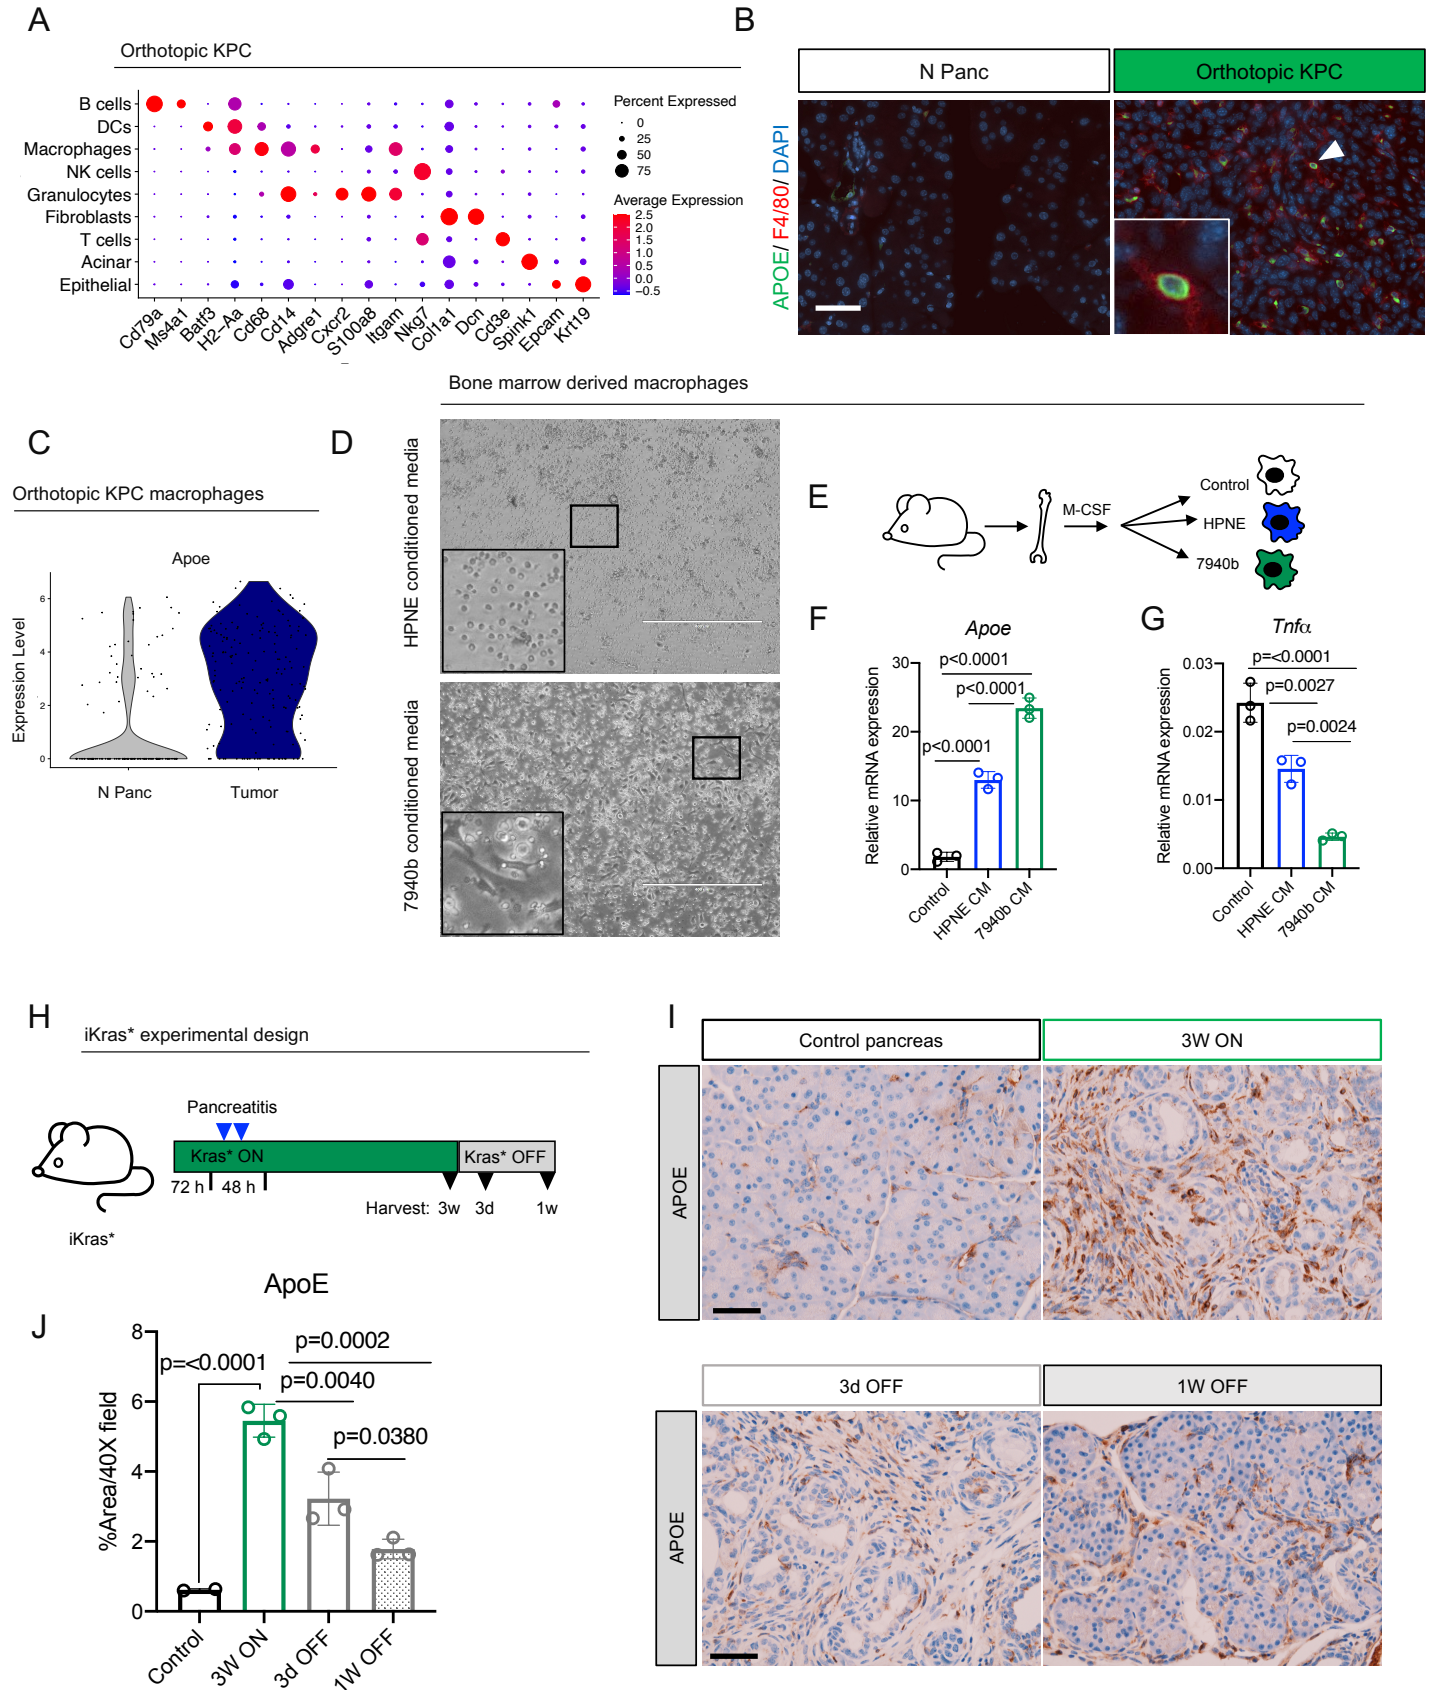

**Supplementary Figure 2. APOE is highly expressed by tumor-associated macrophages. (A)** Dot plot of lineage markers used to define identified cell populations in orthotopic KPC tumors (n=2). Color of the dot represents average expression. Size of the dot represents expression frequency. **(B)** Co-immunofluorescence staining on normal mouse pancreas (N Panc) and orthotopic KPC tumor for APOE (green), F4/80 (red) and DAPI (blue). White arrowhead denotes APOE and F4/80 colocalization. White box represents higher magnification. Scale bars, 100  $\mu$ m. **(C)** Violin plot of normalized ApoE expression in mouse normal pancreas (grey) and tumor (navy) samples. **(D)** Bright field images of bone marrow cells cultured with either HPNE (top) or 7940b (bottom) conditioned media for 5 days. Scale bar, 400  $\mu$ m. Inset represents higher magnification of boxed area. **(E)** Experimental design schematic. **(F)** qRT-PCR analysis of *ApoE* and **(G)** *Tnfa* mRNA levels relative to *Cyclophilin A* housekeeping in untreated macrophages (control), and macrophages treated with either HPNE or 7940b conditioned media for 24 hours. Statistical significance was determined using one-way ANOVA with Tukey's test for multiple correction. **(H)** iKras\* experimental design. **(I)** Immunohistochemical staining for APOE in mouse normal pancreas, pancreatic tissue after 3 weeks of oncogenic *Kras* expression (3W ON), and extinguishment of oncogenic *Kras* expression for 3 days (3d OFF) and 1 week (1W OFF). Scale bars, 50  $\mu$ m. **(J)** Quantitation of positive APOE staining as percent area in a 40x field. 5 images per mouse were averaged. Control (n=2), 3W ON (n=3), 3d OFF (n=3), and 1W OFF (n=3). W=week. d=day. Statistical significance was determined using one-way ANOVA with Tukey's test for multiple correction.
