# Supplementary material
Source: PubMed Central journal article supplement (PMC9662877)
Supplement: can-20-3929_figure_sf3_suppsf3.pdf [file can-20-3929_figure_sf3_suppsf3.pdf]

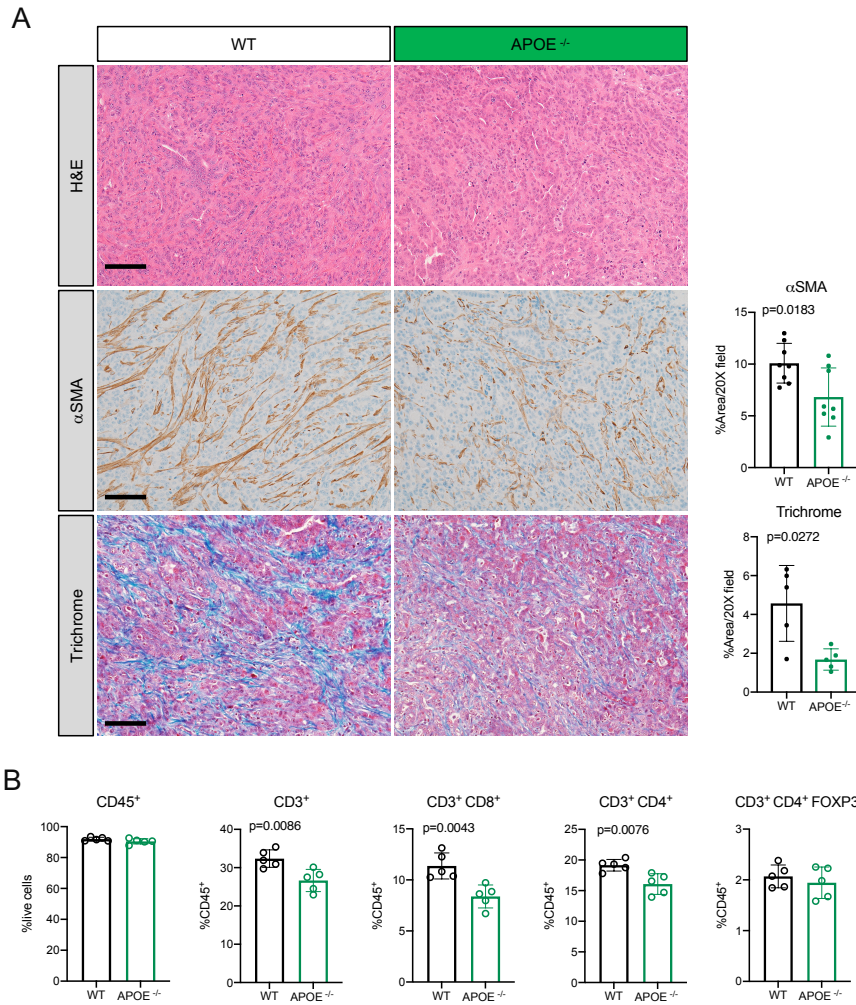

**Supplementary Figure 3. T cell infiltration is altered in APOE deficient mice. (A)** Representative images of Hematoxylin & Eosin (H&E) stain, immunohistochemical staining for  $\alpha$ SMA, and Gomori Trichrome in WT and ApoE<sup>-/-</sup> mice. Scale bars, 100  $\mu$ m. Quantitation of positive immunohistochemical stain as percent area per 20x field in WT (n=5-8) and ApoE<sup>-/-</sup> mice (n=5-8) (right panel). **(B)** Flow cytometry analysis for total immune cells (CD45<sup>+</sup>), total T cells (CD3<sup>+</sup>), CD8<sup>+</sup> T cells (CD3<sup>+</sup> CD8<sup>+</sup>), CD4<sup>+</sup> T cells (CD3<sup>+</sup> CD4<sup>+</sup>), and regulatory T cells (CD3<sup>+</sup> CD4<sup>+</sup> FOXP3<sup>+</sup>) in WT (n=5) and APOE<sup>-/-</sup> (n=5) spleen samples. Statistical significance was determined using two-tailed *t* test.
