# Supplementary material
Source: PubMed Central journal article supplement (PMC9662877)
Supplement: can-20-3929_figure_sf4_suppsf4.pdf [file can-20-3929_figure_sf4_suppsf4.pdf]

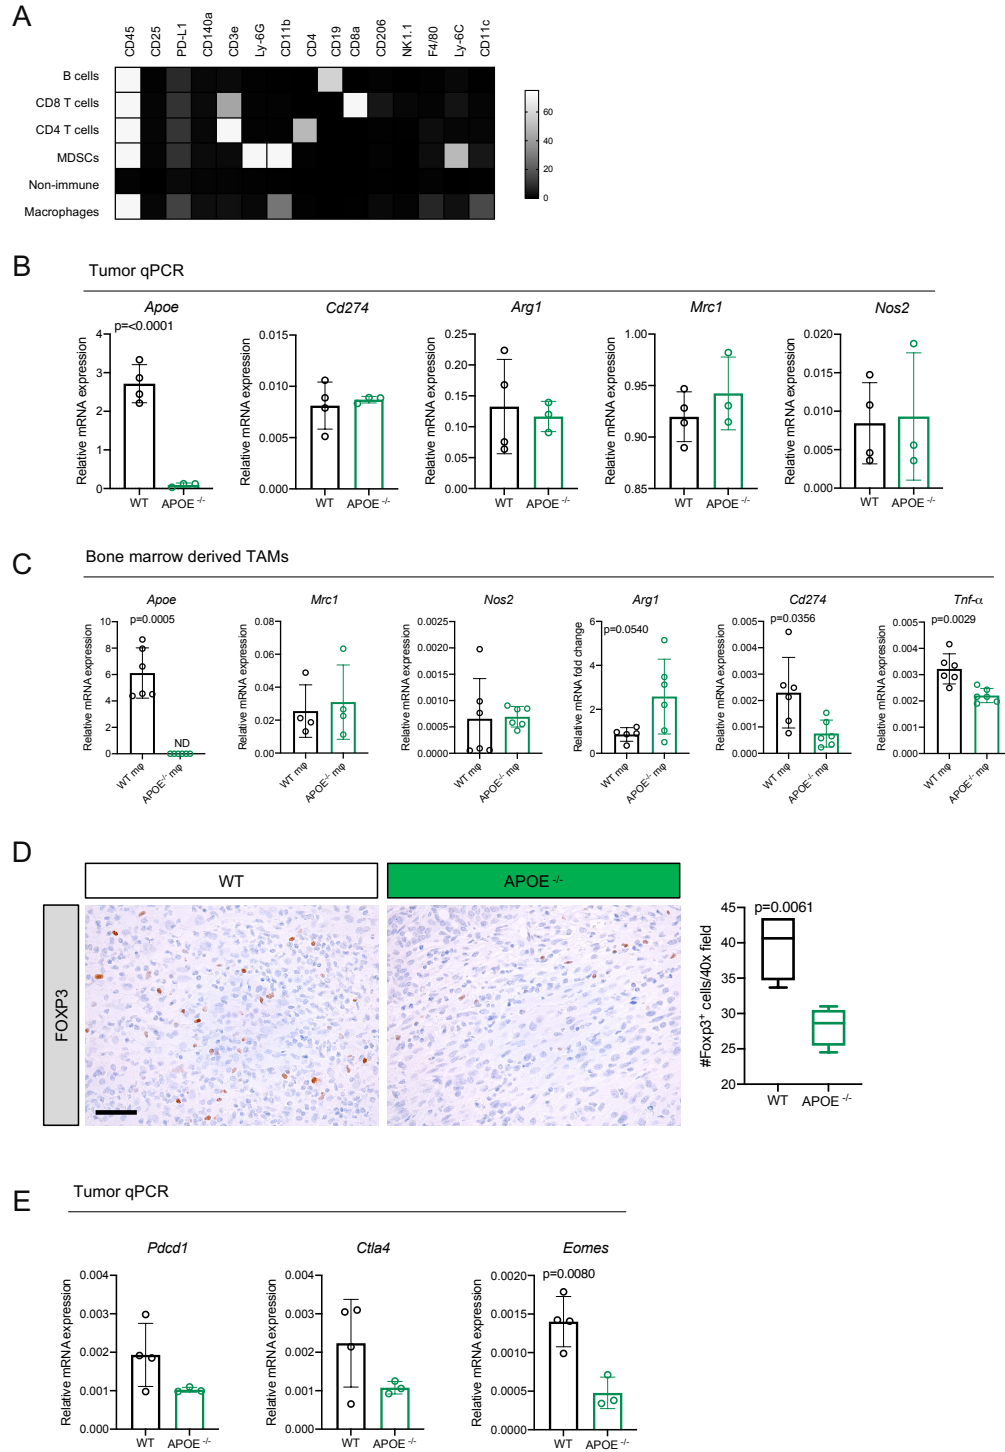

**Supplementary Figure 4. Mice deficient in APOE have fewer regulatory T cells and express lower levels of T cell exhaustion markers.** (A) Heatmap of lineage markers used to define cell populations. Low expression is in black, while high marker expression is in white. (B) qRT-PCR analysis of *ApoE*, *Cd274*, *Arg1*, *Mrc1*, and *Nos2* mRNA levels relative to *Cyclophilin A* housekeeping in WT (n=4) and *ApoE*<sup>-/-</sup> (n=3) tumors. Statistical significance was determined using two-tailed *t* tests. (C) qRT-PCR analysis of *ApoE*, *Mrc1*, *Nos2*, *Cd274*, and *Tnfα* mRNA levels relative to *Cyclophilin A* housekeeping in WT TAMs (n=4-6) and *ApoE*<sup>-/-</sup> TAMs (n=4-6) tumors. Statistical significance was determined using two-tailed *t* tests. ND = not detected. (D) Immunohistochemical staining for FOXP3 in WT and *APOE*<sup>-/-</sup> tumors. Scale bars, 50 μm. Quantitation of number of Foxp3<sup>+</sup> positive cells in at least 3, 40x fields in WT (n= 4) and *ApoE*<sup>-/-</sup> mice (n=4) (right panel). Statistical significance was determined by two-tailed *t* test. (E) qRT-PCR analysis of *Pdcd1*, *Ctla4*, and *Eomes* mRNA levels relative to *Cyclophilin A* housekeeping in WT (n=4) and *ApoE*<sup>-/-</sup> (n=3) tumors.
