# Supplementary material
Source: PubMed Central journal article supplement (PMC9662877)
Supplement: can-20-3929_figure_sf5_suppsf5.pdf [file can-20-3929_figure_sf5_suppsf5.pdf]

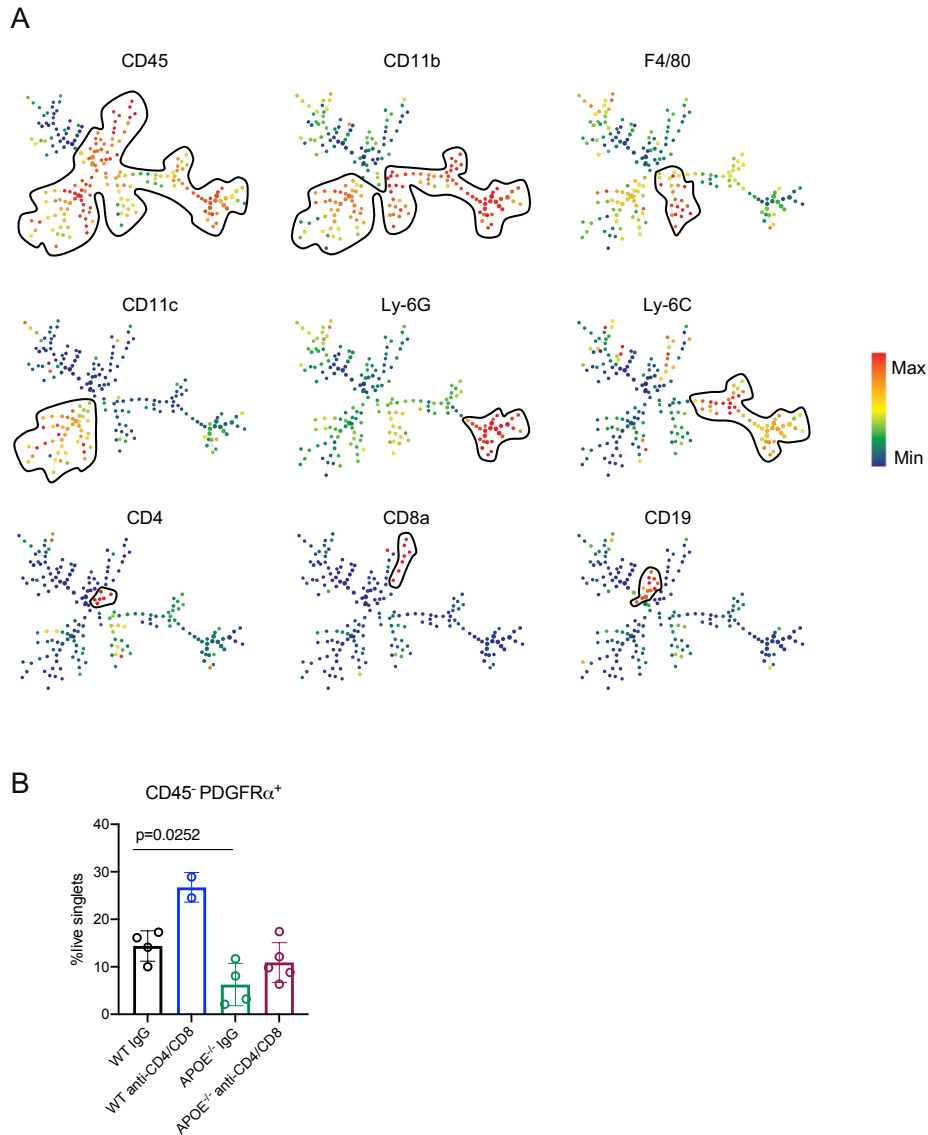

**Supplementary Figure 5. Anti-tumor phenotype in ApoE deficient animals is rescued upon T cell depletion. (A)** Representative SPADE plots of defining marker for identified cell populations. High expression in red. Low expression in blue. **(B)** Manual gating quantitation of fibroblasts (CD45<sup>-</sup> PDGFR $\alpha$ <sup>+</sup>) in WT (n=4), WT anti-CD4/CD8 (n=2), ApoE<sup>-/-</sup> (n=4), and ApoE<sup>-/-</sup> anti-CD4/CD8 (n=5) tumors. Statistical significance was determined by two-tailed *t* tests between groups.
