# Supplementary material
Source: PubMed Central journal article supplement (PMC9662877)
Supplement: can-20-3929_figure_sf6_suppsf6.pdf [file can-20-3929_figure_sf6_suppsf6.pdf]

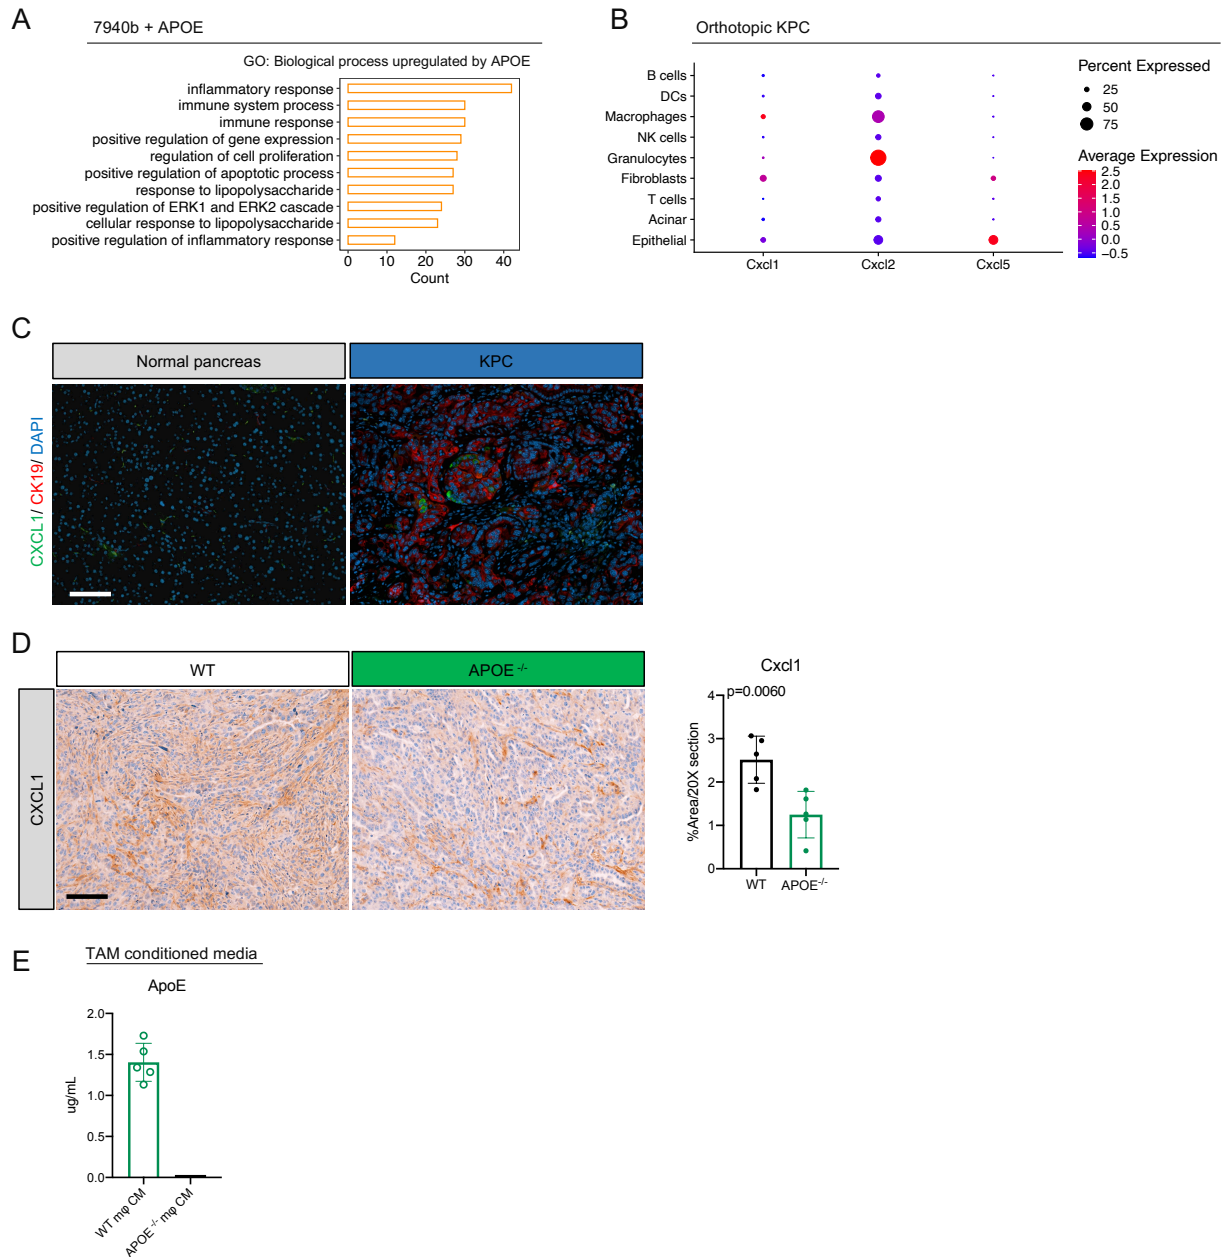

**Supplementary Figure 6. APOE regulates *Cxcl1* expression in tumor cells and fibroblasts.** (A) Biological processes upregulated in 7940b KPC cells treated with recombinant APOE, derived from DAVID functional annotation platform using the top 500 genes induced by recombinant APOE. (B) Dot plot for *Cxcl1*, *Cxcl2*, and *Cxcl5* in orthotopic KPC samples (n=2). Color denotes average expression. Size of dot represents expression frequency. (C) Representative co-immunofluorescence staining of CXCL1 (green), CK19 (red), and DAPI (blue) in mouse normal pancreas compared to mouse KPC tumor. Scale bars, 100  $\mu$ m. (D) Representative immunohistochemical staining for CXCL1 in WT and ApoE<sup>-/-</sup> mice. Scale bars, 100  $\mu$ m. Quantitation of positive CXCL1 staining as percent area per 20x field in WT (n= 5) and ApoE<sup>-/-</sup> mice (n=5). Statistical significance determined by two-tailed *t* tests. (E) ApoE concentration ( $\mu$ g/mL) in wild type TAM conditioned media (n=5) and ApoE<sup>-/-</sup> TAM conditioned media (n=1).
