# Supplementary material
Source: PubMed Central journal article supplement (PMC9662877)
Supplement: can-20-3929_figure_sf7_suppsf7.pdf [file can-20-3929_figure_sf7_suppsf7.pdf]

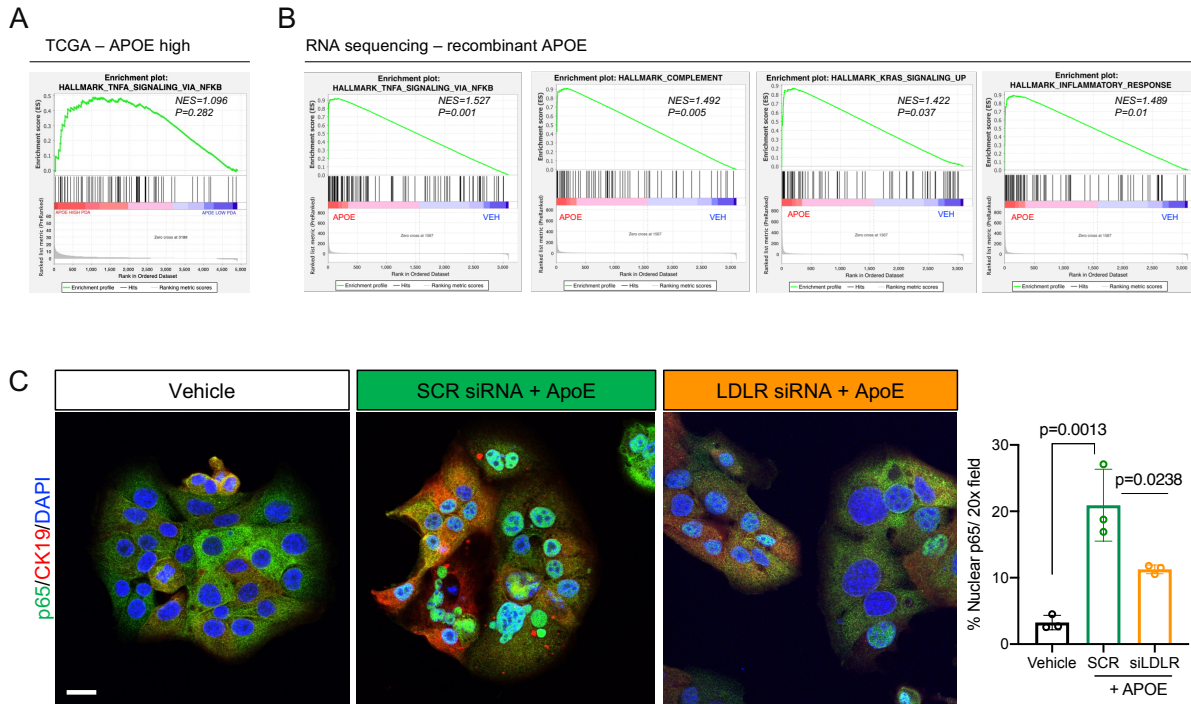

**Supplementary Figure 7. APOE regulates tumor cell *Cxcl1* production via NF- $\kappa$ B signaling. (A)** Gene set enrichment analysis of NF- $\kappa$ B pathway enrichment in PDA TCGA APOE high tumors. **(B)** Gene set enrichment analysis of complement, NF- $\kappa$ B pathway, Kras signaling, and inflammatory response pathway enrichment in 7940b KPC cells treated with 0.3 $\mu$ g/mL recombinant ApoE (n=3) compared to vehicle (n=3) for 48 hours. **(C)** Representative co-immunofluorescence staining of p65 (green), CK19 (red) and DAPI (blue) in 7940b tumor cells that were untreated or treated with scramble siRNA or LDLR siRNA for 48 hours. Recombinant ApoE (0.3 $\mu$ g/mL) was then added for 1 hour. Scale bars, 25  $\mu$ m. Quantitation of percent nuclear p65 in a 20x field in vehicle (n=3), scramble siRNA + ApoE (n=3), and LDLR siRNA + ApoE (n=3). Statistical significance was determined using one-way ANOVA with Tukey's test for multiple comparisons.
